# Supplementary material for: Intestinal Transcriptomes of Nematodes: Comparison of the Parasites Ascaris suum and Haemonchus contortus with the Free-living Caenorhabditis elegans
Source: PLoS Negl Trop Dis. 2008 Aug 6;2(8):e269. doi: 10.1371/journal.pntd.0000269 (PMC2483350; doi:10.1371/journal.pntd.0000269)
Supplement: Table S2 — Identification of 150 Intestine-enriched Genes in A. suum. (0.06 MB XLS) [file pntd.0000269.s004.xls]

## Sheet: Table S2a
Table S2. Identification of 150 Intestine-enriched Genes in A. suum.
As Gene	Int. ESTs	Non-int. ESTs	p-value		Best NR Match
					As Contig	BLAST e-value	% ID	NR Description
AS00075.cl	353	11	3e-197		AS00075	1.1e-10	31.5	emb|CAA93430.1| Hypothetical protein ZK596.1 [Caenorhabditis elegans] >ref|NP_502026.1| ZK596.1 [Caenorhabditis elegans]
AS00007.cl	273	11	1e-149		AS03123	1e-12	30.1	emb|CAB03057.1| Hypothetical protein F35C5.8 [Caenorhabditis elegans] >ref|NP_496745.1| F35C5.8 [Caenorhabditis elegans]
AS00063.cl	403	142	6.6e-130		AS02763	1.6e-54	79.5	ref|NP_491282.1| F28H1.2 [Caenorhabditis elegans] >gb|AAB52338.1| Calponin protein 3 [Caenorhabditis elegans]
AS02507.cl	188	9	5.7e-102
AS00344.cl	176	12	1.4e-91		AS13789	8.9e-16	48.8	gb|AAT00460.1| endozepine [Cyprinus carpio]
AS00074.cl	146	3	6.4e-85		AS00132	2e-07	38.4	ref|XP_780679.1| PREDICTED: similar to Granulins precursor (Acrogranin) (Proepithelin) (PEPI) [Strongylocentrotus purpuratus]
AS00080.cl	108	13	9.8e-52		AS03161	5.3e-187	93.7	emb|CAB05817.1| Hypothetical protein T25C8.2 [Caenorhabditis elegans] >ref|NP_499809.1| T25C8.2 [Caenorhabditis elegans]
AS03019.cl	109	14	1.8e-51		AS03237	8.6e-54	59.5	emb|CAA88850.1| Hypothetical protein C44F1.3 [Caenorhabditis elegans] >ref|NP_497763.1| gaLECtin family member (lec-4) [Caenorhabditis elegans]
AS01418.cl	86	5	1.1e-46		AS03069	1.2e-52	48	emb|CAE66772.1| Hypothetical protein CBG12127 [Caenorhabditis briggsae]
AS00128.cl	100	14	1.8e-46		AS03243	4.5e-23	25.4	gb|AAY58318.1| C-type lectin precursor [Necator americanus]
AS00955.cl	67	0	3.7e-42		AS00985	5.6e-16	85.1	emb|CAE70912.1| Hypothetical protein CBG17709 [Caenorhabditis briggsae]
AS00709.cl	54	0	3.1e-34		AS02106	1.4e-92	75.6	emb|CAC00543.1| necepsin II [Necator americanus]
AS00318.cl	52	2	4.2e-30		AS02780	1.2e-20	37.9	emb|CAE69220.1| Hypothetical protein CBG15260 [Caenorhabditis briggsae]
AS00167.cl	52	4	6.1e-28		AS00167	1.1e-56	52.7	emb|CAA97800.1| Hypothetical protein F58B3.2 [Caenorhabditis elegans] >ref|NP_502193.1| LYSozyme family member (lys-5) [Caenorhabditis elegans]
AS00118.cl	105	58	1.6e-27		AS01133	5.3e-57	100	dbj|BAD24819.1| macrophage migration inhibitory factor [Ascaris suum]
AS02676.cl	40	4	4.6e-21		AS02676	2.1e-24	34.6	emb|CAE68693.1| Hypothetical protein CBG14608 [Caenorhabditis briggsae]
AS00425.cl	44	7	6.2e-21		AS03141	2.8e-78	76.7	ref|NP_496787.1| F29C12.4 [Caenorhabditis elegans] >emb|CAB04216.1| Hypothetical protein F29C12.4 [Caenorhabditis elegans] >sp|Q9XV52|EFGM_CAEEL Probable elongation factor G, mitochondrial precursor (mEF-G)
AS01750.cl	43	8	1e-19		AS03033	3.1e-72	63.5	gb|AAB52498.1| Carbonic anhydrase protein 3 [Caenorhabditis elegans] >ref|NP_510674.1| Carbonic AnHydrase family member (cah-3) [Caenorhabditis elegans] >sp|Q27504|CAH3_CAEEL Putative carbonic anhydrase 3 (Carbonate dehydratase 3)
AS01052.cl	33	2	6.5e-19		AS03077	3.5e-57	58.3	emb|CAE61904.1| Hypothetical protein CBG05896 [Caenorhabditis briggsae]
AS00455.cl	36	4	8.5e-19		AS01954	7.8e-46	52.4	emb|CAA92297.1| Hypothetical protein F20C5.4 [Caenorhabditis elegans] >ref|NP_501511.1| F20C5.4 [Caenorhabditis elegans]
AS04067.cl	30	1	3e-18
AS00142.cl	38	7	1.1e-17		AS01857	4.9e-77	67.5	emb|CAE60903.1| Hypothetical protein CBG04619 [Caenorhabditis briggsae]
AS00071.cl	26	0	3.5e-17
AS00083.cl	26	1	7.2e-16		AS02946	7.3e-39	46.2	emb|CAE60904.1| Hypothetical protein CBG04620 [Caenorhabditis briggsae]
AS01423.cl	30	4	1.9e-15		AS03078	2.1e-11	32.1	emb|CAF91844.1| unnamed protein product [Tetraodon nigroviridis]
AS02487.cl	33	7	5e-15		AS02487	4.4e-62	62.5	ref|NP_001017776.1| hypothetical protein LOC550473 [Danio rerio] >gb|AAH92903.1| Hypothetical protein LOC550473 [Danio rerio]
AS02282.cl	19	0	6.5e-13
AS02963.cl	19	0	6.5e-13		AS02963	5.3e-18	52.9	emb|CAG11908.1| unnamed protein product [Tetraodon nigroviridis]
AS00210.cl	16	0	4.4e-11
AS01029.cl	16	0	4.4e-11		AS02902	4.3e-82	48.9	emb|CAA94782.1| Hypothetical protein K06A4.3 [Caenorhabditis elegans] >ref|NP_505448.1| K06A4.3 [Caenorhabditis elegans]
AS05213.cl	20	3	1.2e-10
AS00346.cl	17	1	1.5e-10		AS02758	4.5e-39	37.5	emb|CAB05736.1| Hypothetical protein F52F12.7 [Caenorhabditis elegans] >ref|NP_492624.1| F52F12.7 [Caenorhabditis elegans] >sp|O17883|YX7O_CAEEL Hypothetical protein F52F12.7 in chromosome I
AS05147.cl	18	2	2.9e-10
AS00026.cl	16	1	5.6e-10		AS16101	2.7e-30	68.3	ref|NP_494897.3| R05F9.12 [Caenorhabditis elegans] >gb|AAA83174.3| Hypothetical protein R05F9.12 [Caenorhabditis elegans]
AS00333.cl	16	1	5.6e-10		AS11954	2.1e-14	72.3	emb|CAE68837.1| Hypothetical protein CBG14798 [Caenorhabditis briggsae] >emb|CAE68762.1| Hypothetical protein CBG14697 [Caenorhabditis briggsae]
AS00082.cl	14	0	7.3e-10		AS02515	3.1e-26	36.8	gb|AAA81702.1| Hypothetical protein F13D11.1 [Caenorhabditis elegans] >ref|NP_508977.1| F13D11.1 [Caenorhabditis elegans]
AS00124.cl	60	67	4.2e-09		AS03200	2.3e-52	79.8	dbj|BAC66614.1| As16 [Ascaris suum]
AS02945.cl	14	1	8.2e-09		AS02945	6e-10	55.3	gb|AAF36049.1| Hypothetical protein Y74C9A.2 [Caenorhabditis elegans] >ref|NP_490661.1| Y74C9A.2 [Caenorhabditis elegans]
AS06066.cl	14	1	8.2e-09
AS01392.cl	12	0	1.2e-08
AS01923.cl	15	2	1.4e-08		AS02891	1.4e-21	39	emb|CAA94110.1| Hypothetical protein Y16B4A.2 [Caenorhabditis elegans] >emb|CAB07544.1| Hypothetical protein Y16B4A.2 [Caenorhabditis elegans] >emb|CAA19443.1| Hypothetical protein Y16B4A.2 [Caenorhabditis elegans] >ref|NP_510452.1| Y16B4A.2 [Caenorhabditis elegans]
AS02451.cl	15	2	1.4e-08		AS02451	1.2e-25	39.2	emb|CAA80144.1| Hypothetical protein ZK512.1 [Caenorhabditis elegans] >ref|NP_499019.1| ZK512.1 [Caenorhabditis elegans] >sp|P34639|YOQ1_CAEEL Hypothetical protein ZK512.1 in chromosome III
AS02971.cl	17	4	2.1e-08		AS02971	4.1e-18	43.2	emb|CAA94355.1| Hypothetical protein R102.1 [Caenorhabditis elegans] >ref|NP_501974.1| R102.1 [Caenorhabditis elegans]
AS02901.cl	13	1	3.1e-08		AS02901	1.3e-10	30.1	emb|CAE64593.1| Hypothetical protein CBG09348 [Caenorhabditis briggsae]
AS01737.cl	21	9	4.5e-08		AS02841	9e-99	98.9	gb|AAV32835.1| neuronal calcium sensor [Parascaris equorum]
AS02788.cl	11	0	4.9e-08		AS02788	5.3e-28	36.1	dbj|BAC30440.1| unnamed protein product [Mus musculus]
AS05255.cl	11	0	4.9e-08		AS16109	6.9e-50	66.4	emb|CAE62570.1| Hypothetical protein CBG06683 [Caenorhabditis briggsae]
AS02962.cl	14	2	5e-08		AS02962	7.4e-51	74.8	ref|NP_001008438.1| MGC79498 protein [Xenopus tropicalis] >gb|AAH80328.1| MGC79498 protein [Xenopus tropicalis]
AS01845.cl	15	3	6.2e-08		AS02387	2.7e-34	75.2	emb|CAE70917.1| Hypothetical protein CBG17716 [Caenorhabditis briggsae]
AS00061.cl	28	19	7e-08		AS03099	2.5e-45	45	emb|CAE65794.1| Hypothetical protein CBG10899 [Caenorhabditis briggsae]
AS01880.cl	18	7	1.8e-07		AS02198	1.8e-26	45.4	emb|CAE66793.1| Hypothetical protein CBG12153 [Caenorhabditis briggsae]
AS00207.cl	10	0	2e-07
AS01738.cl	10	0	2e-07
AS02055.cl	10	0	2e-07
AS01216.cl	16	5	2.2e-07		AS02748	3.8e-28	35.2	emb|CAB03054.1| Hypothetical protein F35C5.5b [Caenorhabditis elegans] >ref|NP_496742.1| F35C5.5b [Caenorhabditis elegans]
AS00085.cl	14	4	7.2e-07
AS00447.cl	9	0	8.1e-07		AS11621	1.7e-27	38.7	gb|AAA80437.6| Carbonic anhydrase protein 5 [Caenorhabditis elegans] >ref|NP_509186.3| Carbonic AnHydrase family member (cah-5) [Caenorhabditis elegans] >sp|Q10462|CAH5_CAEEL Putative carbonic anhydrase 5 precursor (Carbonate dehydratase 5)
AS00458.cl	9	0	8.1e-07		AS02404	1.8e-12	29.5	gb|AAB61596.1| galectin [Globodera rostochiensis]
AS01281.cl	9	0	8.1e-07
AS01641.cl	9	0	8.1e-07		AS01641	8.2e-12	35	emb|CAE59001.1| Hypothetical protein CBG02276 [Caenorhabditis briggsae]
AS01878.cl	9	0	8.1e-07
AS02053.cl	9	0	8.1e-07		AS02053	4e-18	32.6	emb|CAE68423.1| Hypothetical protein CBG14203 [Caenorhabditis briggsae]
AS02681.cl	9	0	8.1e-07
AS02113.cl	27	23	1.4e-06		AS02113	3.8e-70	81.9	ref|XP_395791.2| PREDICTED: similar to ENSANGP00000024655 [Apis mellifera]
AS00475.cl	10	1	1.6e-06
AS00997.cl	23	18	3e-06		AS03100	7.1e-32	100	dbj|BAD89092.1| cecropin P4 [Ascaris suum] >dbj|BAD89088.1| cecropin P4 [Ascaris suum]
AS02670.cl	8	0	3.3e-06
AS02677.cl	8	0	3.3e-06
AS06364.cl	8	0	3.3e-06
AS01749.cl	16	8	3.4e-06		AS01749	7e-12	52.5	gb|AAU04397.1| EDRK rich factor [Brugia malayi]
AS02014.cl	14	6	5.2e-06		AS02802	2.8e-101	76.5	emb|CAE72504.1| Hypothetical protein CBG19683 [Caenorhabditis briggsae]
AS00691.cl	9	1	6.1e-06		AS02313	6.9e-57	41.8	emb|CAE59001.1| Hypothetical protein CBG02276 [Caenorhabditis briggsae]
AS02344.cl	16	9	7.1e-06		AS02344	7.8e-79	68.9	emb|CAE74328.1| Hypothetical protein CBG22041 [Caenorhabditis briggsae]
AS02025.cl	11	3	7.6e-06
AS01638.cl	7	0	1.3e-05		AS01638	4.1e-63	78.6	emb|CAE62153.1| Hypothetical protein CBG06199 [Caenorhabditis briggsae]
AS02605.cl	7	0	1.3e-05		AS02605	2.1e-51	59.1	sp|Q8WT59|FAR1_ONCGU Fatty-acid and retinol-binding protein 1 precursor (Og-FAR-1)
AS02112.cl	13	6	1.5e-05		AS13844	1.2e-59	48.7	gb|AAH88905.1| LOC496316 protein [Xenopus laevis]
AS00871.cl	58	95	2.1e-05		AS02806	2e-153	80.8	gb|AAD38403.1| fructose 1,6 bisphosphate aldolase [Onchocerca volvulus]
AS02452.cl	8	1	2.2e-05		AS04090	1.4e-21	37.8	emb|CAE72189.1| Hypothetical protein CBG19297 [Caenorhabditis briggsae]
AS02549.cl	8	1	2.2e-05		AS02549	2.4e-47	54.6	gb|AAO39177.1| nuclear receptor NHR-64 [Caenorhabditis elegans]
AS02713.cl	8	1	2.2e-05		AS02713	5.1e-08	30.9	gb|AAH89126.1| Unknown (protein for MGC:85112) [Xenopus laevis]
AS00001.cl	47	71	2.4e-05		AS03225	5.8e-158	84.7	emb|CAB00853.4| Hypothetical protein C54C6.2 [Caenorhabditis elegans] >ref|NP_497728.2| C54C6.2 [Caenorhabditis elegans] >prf||1604364A beta tubulin
AS00213.cl	9	2	2.5e-05		AS11811	4.2e-09	47	gb|AAA82371.1| Hypothetical protein B0302.5 [Caenorhabditis elegans] >ref|NP_510785.1| B0302.5 [Caenorhabditis elegans] >sp|Q10928|YWR5_CAEEL Hypothetical protein B0302.5 in chromosome X
AS00025.cl	15	10	3.5e-05		AS00039	8.8e-11	35.8	ref|NP_503226.1| R11G11.6 [Caenorhabditis elegans] >gb|AAC69081.1| Hypothetical protein R11G11.6 [Caenorhabditis elegans]
AS00328.cl	6	0	5.4e-05		AS00328	1.4e-17	37.9	gb|AAC69005.1| Hypothetical protein C18A11.1 [Caenorhabditis elegans] >ref|NP_509358.1| C18A11.1 [Caenorhabditis elegans]
AS00951.cl	6	0	5.4e-05		AS13842	6.9e-61	54.5	emb|CAA22259.1| Hypothetical protein Y69E1A.7 [Caenorhabditis elegans] >ref|NP_502044.1| AQuaPorin or aquaglyceroporin related family member (aqp-3) [Caenorhabditis elegans]
AS01274.cl	6	0	5.4e-05		AS01877	1.1e-19	36.9	gb|AAF60517.1| Pdgf/vegf growth factor related protein 1 [Caenorhabditis elegans] >ref|NP_497461.1| PDGF/VEGF growth factor related family member (pvf-1) [Caenorhabditis elegans]
AS01636.cl	6	0	5.4e-05
AS01932.cl	6	0	5.4e-05		AS01935	4.1e-89	80.7	emb|CAA71620.1| glutathione S-transferase [Ascaris suum] >emb|CAA53218.1| glutathione transferase; glutathione-S-transferase [Ascaris suum] >gb|AAB30767.1| glutathione S-transferase, AsGST1 [Ascaris suum, uterus and ovary, Peptide, 206 aa] >sp|P46436|GST1_ASCSU Glutathione S-transferase 1 (GST class-sigma) >pir||S38626 glutathione transferase (EC 2.5.1.18) GST1 - pig roundworm
AS02052.cl	6	0	5.4e-05		AS02052	1.7e-10	49.2	emb|CAE58749.1| Hypothetical protein CBG01939 [Caenorhabditis briggsae]
AS02319.cl	6	0	5.4e-05
AS12001.cl	6	0	5.4e-05		AS14164	5.5e-11	78	ref|XP_396106.2| PREDICTED: similar to CG1709-PA, isoform A, partial [Apis mellifera]
AS00430.cl	23	25	6.4e-05		AS02996	6.5e-182	84	gb|AAD13154.1| heat shock protein 70 [Setaria digitata]
AS00141.cl	10	4	6.4e-05		AS00141	3.1e-42	68.4	emb|CAA62521.1| cytidine deaminase [Brugia pahangi]
AS01739.cl	9	3	7.6e-05
AS00690.cl	7	1	8.1e-05		AS01440	3.8e-22	35.6	emb|CAE65056.1| Hypothetical protein CBG09901 [Caenorhabditis briggsae]
AS02056.cl	7	1	8.1e-05		AS02056	1.4e-40	50.6	emb|CAE66088.1| Hypothetical protein CBG11305 [Caenorhabditis briggsae]
AS02552.cl	7	1	8.1e-05
AS01230.cl	8	2	8.4e-05		AS01890	4.1e-63	51.1	ref|XP_792294.1| PREDICTED: similar to annexin VII isoform 1 [Strongylocentrotus purpuratus]
AS01267.cl	8	2	8.4e-05		AS02082	9.8e-51	51.9	gb|EAL41340.1| ENSANGP00000027336 [Anopheles gambiae str. PEST] >ref|XP_559572.1| ENSANGP00000027336 [Anopheles gambiae str. PEST]
AS02703.cl	8	2	8.4e-05		AS02703	7.5e-12	55.7	emb|CAE69223.1| Hypothetical protein CBG15263 [Caenorhabditis briggsae]
AS00325.cl	11	6	0.00011
AS00906.cl	10	5	0.00015		AS01940	6.9e-43	38.8	emb|CAB02316.2| Hypothetical protein F26D10.9 [Caenorhabditis elegans] >ref|NP_503064.2| Amino acid Transporter Glycoprotein subunit family member (atg-1) [Caenorhabditis elegans]
AS00694.cl	12	8	0.00016
AS00081.cl	5	0	0.00022
AS00330.cl	5	0	0.00022		AS01876	1.2e-61	55.4	emb|CAE68594.1| Hypothetical protein CBG14465 [Caenorhabditis briggsae]
AS01373.cl	5	0	0.00022		AS01373	9e-34	72.4	gb|AAN63404.1| Nuclear hormone receptor family protein 80, isoform b [Caenorhabditis elegans] >ref|NP_871630.1| Nuclear Hormone Receptor family member (nhr-80) [Caenorhabditis elegans]
AS01920.cl	5	0	0.00022		AS01920	8.3e-08	26.7	emb|CAE64542.1| Hypothetical protein CBG09285 [Caenorhabditis briggsae]
AS02116.cl	5	0	0.00022
AS02196.cl	5	0	0.00022
AS02281.cl	5	0	0.00022
AS02361.cl	5	0	0.00022
AS02388.cl	5	0	0.00022		AS02388	7.8e-19	42.8	emb|CAG12363.1| unnamed protein product [Tetraodon nigroviridis]
AS02400.cl	5	0	0.00022		AS02400	1.5e-46	85.5	emb|CAB50767.1| putative cuticular collagen protein [Ascaris suum] >emb|CAB85465.1| putative cuticular collagen [Ascaris suum]
AS02401.cl	5	0	0.00022		AS02401	1.3e-66	71.8	ref|NP_502655.1| Ribosomal Protein, Large subunit family member (rpl-18) [Caenorhabditis elegans] >emb|CAA16387.1| Hypothetical protein Y45F10D.12 [Caenorhabditis elegans]
AS05468.cl	5	0	0.00022
AS11575.cl	5	0	0.00022
AS13553.cl	5	0	0.00022
AS00390.cl	7	2	0.00027		AS01948	4.5e-50	50	emb|CAE67001.1| Hypothetical protein CBG12400 [Caenorhabditis briggsae]
AS00702.cl	7	2	0.00027
AS02539.cl	7	2	0.00027
AS00070.cl	6	1	0.00029		AS02098	9.4e-51	53.2	emb|CAE60846.1| Hypothetical protein CBG04555 [Caenorhabditis briggsae]
AS02365.cl	6	1	0.00029		AS02365	5e-20	55.8	emb|CAE57674.1| Hypothetical protein CBG00668 [Caenorhabditis briggsae]
AS02606.cl	6	1	0.00029
AS01430.cl	10	6	0.00029		AS02899	1.1e-76	71.7	emb|CAE70254.1| Hypothetical protein CBG16755 [Caenorhabditis briggsae]
AS00335.cl	9	5	0.00039		AS02663	6.3e-22	39	gb|AAB47548.1| similar to nonmuscle myosin essential light chain encoded by GenBank Accession Number U25057 [Toxocara canis]
AS00219.cl	8	4	0.00053
AS02457.cl	7	3	0.00069		AS02457	1.6e-55	43.1	ref|XP_693286.1| PREDICTED: similar to Folylpolyglutamate synthase, mitochondrial precursor (Folylpoly-gamma-glutamate synthetase) (FPGS) (Tetrahydrofolylpolyglutamate synthase) [Danio rerio]
AS00528.cl	21	29	0.00074		AS02634	6.3e-55	95.5	gb|AAA97886.1| ubiquitin c-terminal extension protein UBIcep86
AS00192.cl	13	13	0.00078		AS10766	9.1e-09	38.2	gb|AAK11515.1| CArG-binding factor A [Xenopus laevis]
AS01639.cl	6	2	0.00087		AS01781	4.3e-39	40.3	emb|CAE45742.1| Hypothetical protein T07C4.9b [Caenorhabditis elegans] >ref|NP_001022756.1| T07C4.9b [Caenorhabditis elegans]
AS02666.cl	6	2	0.00087
AS00216.cl	4	0	0.0009
AS00340.cl	4	0	0.0009
AS00341.cl	4	0	0.0009		AS00341	2.4e-10	31.7	emb|CAE59776.1| Hypothetical protein CBG03228 [Caenorhabditis briggsae]
AS00483.cl	4	0	0.0009		AS00483	5.3e-27	55.3	ref|XP_216325.3| PREDICTED: similar to short chain dehydrogenase reductase 9 [Rattus norvegicus]
AS00707.cl	4	0	0.0009		AS00707	5.5e-21	64.9	emb|CAE62153.1| Hypothetical protein CBG06199 [Caenorhabditis briggsae]
AS00952.cl	4	0	0.0009		AS00952	2.5e-45	56.9	emb|CAA16405.1| Hypothetical protein Y51A2D.5 [Caenorhabditis elegans] >ref|NP_507624.1| Y51A2D.5 [Caenorhabditis elegans]
AS00982.cl	4	0	0.0009
AS00991.cl	4	0	0.0009		AS00991	1.4e-68	85.2	gb|AAA82279.1| Hypothetical protein C06E7.3a [Caenorhabditis elegans] >ref|NP_500871.1| C06E7.3a [Caenorhabditis elegans] >sp|P50306|METL_CAEEL Probable S-adenosylmethionine synthetase C06E7.3 (Methionine adenosyltransferase) (AdoMet synthetase)
AS01403.cl	4	0	0.0009		AS15519	2.5e-22	63.6	dbj|BAC00499.1| ASABF-delta [Ascaris suum]
AS01951.cl	4	0	0.0009		AS09559	8.6e-21	33.7	gb|AAP68960.1| Hypothetical protein B0361.11 [Caenorhabditis elegans] >ref|NP_001021124.1| B0361.11 [Caenorhabditis elegans] >sp|Q7Z118|YMPB_CAEEL Hypothetical protein B0361.11 in chromosome III
AS02224.cl	4	0	0.0009
AS02225.cl	4	0	0.0009		AS02225	9.2e-36	85.5	gb|AAY66945.1| 40S ribosomal protein S27 [Ixodes scapularis]
AS02226.cl	4	0	0.0009
AS05399.cl	4	0	0.0009
AS05625.cl	4	0	0.0009		AS15925	6e-27	100	emb|CAA60048.1| cytoplasmic intermediate filament protein [Ascaris lumbricoides]
AS11649.cl	4	0	0.0009
AS11908.cl	4	0	0.0009
AS15750.cl	4	0	0.0009
